# Supplementary material for: Frontiers: Asymmetric Effects of Recreational Cannabis Legalization
Source: Atypon-hosted journal article supplement (doi:10.1287/mksc.2019.1176), 2019-08-07
Supplement: mksc.2019.1176.sm1.pdf [file mksc.2019.1176.sm1.pdf]

## **Online Appendix I**

### **Summaries of Relevant Literatures**

#### ***Does Cannabis Legalization Affect the Youth?***

Prior research has *not* agreed on the impact of cannabis policy changes on the youth, although it is widely acknowledged as an important topic (Hopfer 2014). Some studies find that changes in cannabis policies significantly influence the youth. For example, based on Monitoring the Future (MTF) surveys, Chaloupka and Laixuthai (1997) found lower cannabis consumption among high school seniors following successful implementation of stricter legislative efforts in the “War on Drugs”; and Cerda et al (2016) find increased cannabis use among 8<sup>th</sup> and 10<sup>th</sup> graders in Washington. Estoup et al. (2016) studied 262 students and found significant increases in perceived risk and negative consequence among those enrolled in substance use intervention after cannabis legalization. In contrast, other studies suggest no or negligible impact of cannabis laws on the youth. Also analyzing MTF surveys, Johnson et al. (1981) reported no significant changes in the youth’s attitude to and consumption of cannabis following cannabis decriminalization in seven states. Thies and Register (1993) and Pacula (1998) drew similar conclusions with data from the National Longitudinal Survey of Youth. A recent survey-based study suggests potentially differential effects of medical cannabis legalization (MCL) on adults’ versus the youth’s cannabis use, and calls for research on the impact of RCL (Mauro et al. 2017). Finally, Rusby et al. (2018) studied 444 adolescents in Oregon and observed no increase in cannabis use after cannabis legalization among those who never used cannabis before, but some increase among existing users. In sum, based on the mixed findings, it is inconclusive how cannabis policies affect the youth.

Besides academic research, government sponsored surveys which take place once every few years also provide some relevant statistics. The 2015 Healthy Kids Colorado Survey results indicate that, after recreational cannabis was legalized in the state, a decreased percentage of youths perceived

regular cannabis use as harmful; however, the proportion of them that ever tried cannabis or used it in the past month remained largely unchanged (Bent 2016). According to 2016 Washington State Healthy Youth Survey, the rates of cannabis use for 8th, 10th, and 12th graders appeared relatively steady in the past decade, despite the state's legalization of recreational cannabis in 2012 (Loria 2017). Although useful, these descriptive surveys by themselves do not proffer formal test of the treatment effect of cannabis legalization, nor do they compare the impact on the youth versus adults.

### ***Is Alcohol a Complement or Substitute to Cannabis?***

There have been debates about the cross-commodity relationship between cannabis and alcohol.

Some studies suggest that alcohol is a substitute to cannabis. Model (1993) documented that, in the states where cannabis is decriminalized, the number of emergency room episodes related to cannabis use increased while that related to alcohol use decreased. She thus concluded that cannabis decriminalization induced substitution away from alcohol to cannabis. Chaloupka and Laixuthai (1997) and DiNardo and Lemieux (2001) made similar conclusions based on MTF surveys of high school seniors. The former found that successful anti-cannabis efforts in the "War on Drugs" had an unintended consequence of raising young people's alcohol use. The latter showed that, after the Federal Uniform Drinking Age Act (which raised legal drinking age to 21), lower alcohol use among the youth was accompanied by a nearly one-for-one increase in cannabis use. In line with these findings based on U.S. data, there are two studies using Australian data from the National Drug Strategy Household Survey (NDSHS). Specifically, Cameron and Williams (2001) found significant positive effect of alcohol price on cannabis consumption, and Clements and Daryal (2005) documented substitutability between cannabis and three alcoholic drinks (beer, spirits, and wine).

Other studies hold opposing views and indicate that cannabis and alcohol are *not* substitutes. Pacula (1998) showed that increased tax on beer lead to reduced cannabis use, indicating

complementarity. Saffer and Chaloupka (1999) analyzed NHSDA (National Survey on Drug Use and Health) data and found strong evidence of complementary cross-price elasticity between alcohol and cannabis in their entire sample. However, such effects were insignificant for women and the youth, and cannabis decriminalization had no effect on alcohol use. Using the same data source, Farrelly et al. (1999) found significant negative effect of beer price on cannabis participation of the youth. Based on the College Alcohol Study (CAS) survey, Williams et al. (2004) showed that increased monetary cost of cannabis reduces both cannabis and alcohol use and that policies restricting access to alcohol (e.g., alcohol ban on campus) reduce both alcohol and cannabis use. Both of their findings suggest that cannabis and alcohol are economic complements. Zhao and Harris (2004) found mixed results regarding the relationship between cannabis and alcohol based on NDSHS data. Kerr et al. (2017) documented an increase in cannabis use after its legalization in Oregon among undergraduates who are also heavy users of alcohol. Based on a survey in Washington, Grant et al. (2018) find that pregnant and parenting women who were not abstinent from cannabis were also likely to consume alcohol.

In summary, previous findings on the cannabis-alcohol interrelationship are inconclusive and often limited to specific populations, calling for further research and implying potential existence of moderators (e.g., population groups). Based on these findings, it is unclear how loosened cannabis laws would affect the alcohol industry.

### ***Is Tobacco a Complement or Substitute to Cannabis?***

The literature on the interrelationship between cannabis and tobacco is relatively sparse. However, it has also provided mixed findings. For example, Chaloupka et al. (1999) found no significant effect of cannabis price on cigarette use, and no significant effect of cigarette price on cannabis participation. Farrelly et al. (1999) reported similar findings for adults but negative effect of cigarette price on cannabis use for the youth. Based on NDSHS survey data, Cameron and Williams (2001) found some

evidence on the complementary cross-price responses in the consumption levels of cannabis and cigarette, and Zhao and Harris (2004) documented the complementary relationship between cannabis and tobacco in terms of participation decisions. Tullis et al. (2003) surveyed 233 college students in the U.S. and concluded that tobacco-smoking initiation often coincides with or follows cannabis use. Based on a survey conducted in 2013, Wang et al. (2016) found higher rate of cannabis-tobacco co-use where medical marijuana is legal. However, a study on the Healthy Minds survey (Kerr et al. 2017) showed no significant change in cigarette use after cannabis legalization. In sum, given the limited literature with inconsistent findings, further research is necessary. Moreover, there has been no direct evidence about how cannabis legalization influences marketing performances (e.g., advertising effectiveness) of the tobacco industry.

#### **Additional References:**

- Bent A (2016). Colorado youth aren't using more marijuana, but they're bearing the brunt of enforcement. *Drug Policy Alliance*, 6/27/2016.
- Clements K, Daryal M (2005). Exogenous shocks and related goods: Drinking and the legalization of marijuana. *Econ. Letters*, 89(1):101-6.
- DiNardo J, Lemieux T (2001). Alcohol, marijuana, and American youth: the unintended consequences of government regulation. *J. Health Economics*, 20(6):991–1010.
- Estoup A, Moise-Campbell C, Varma M, Stewart D (2016). The impact of marijuana legalization on adolescent use, consequences, and perceived risk. *Substance Use & Misuse*, 51(14):1881-7.
- Grant T, Graham J, Carlini B, Ernst C, Brown N (2018). Use of marijuana and other substances among pregnant and parenting women with substance use disorders: Changes in Washington State after marijuana legalization. *J. Studies on Alcohol and Drugs*, 79(1):88-95.
- Hopfer C (2014). Implications of marijuana legalization for adolescent substance use. *Substance Abuse*, 35(4):331-5.
- Johnson L, Bachman J, O'Malley P (1981). *Highlights from Student Drug Use in America 1975-1981*, Rockville, Md.:National Institute on Drug Abuse.
- Kerr D, Bae H, Phibbs S, Kern A (2017). Changes in undergraduates' marijuana, heavy alcohol and cigarette use following legalization of recreational marijuana use in Oregon. *Addiction*, 112(11):1992-2001.
- Loria K (2017). New data shows that teens aren't using marijuana more after it's been legalized. *Business Insider*, 3/22/2017.
- Mauro C, Newswanger P, Santaella-Tenorio J, Mauro P, Carliner H, Martins S (2017). Impact of medical marijuana laws on state-level marijuana use by age and gender, 2004–2013. *Prevention Science*, DOI:

10.1007/s11121-017-0848-3.

Model K (1993). The effect of marijuana decriminalization on hospital emergency room drug episodes: 1975–1978. *J. Amer. Statistical Association*, 88(423):737-47.

Saffer H, Chaloupka F (1999). Demographic differentials in the demand for alcohol and drugs. In *Economic Analysis of Substance Use and Abuse* (Chaloupka, Grossman, Bickel and Saffer Eds). U. Chicago Press, Chicago.

Tullis L, DuPont R, Frost-Pineda K, Gold M (2004). Marijuana and tobacco: A major connection? *J. Addictive Diseases*, 22(3):51-62.

Wang J, Ramo D, Lisha N, Cataldo J (2016). Medical marijuana legalization and cigarette and marijuana co-use in adolescents and adults. *Drug and Alcohol Dependence*, 166:32-8.

Wang K, Goldfarb A (2017), Can offline stores drive online sales? *Journal of Marketing Research*, 54(5): 706-19.

Wilkinson S, Yarnell S, Radhakrishnan R, Ball S, D'Souza D (2016). Marijuana legalization: Impact on physicians and public health. *Annual Review of Medicine*, 67:453-66.

Williams J, Pacula R, Chaloupka F, Wechsler H (2004). Alcohol and marijuana use among college students: economic complements or substitutes? *Health Economics*, 13(9):825-43.

**Online Appendix II**  
**List of U.S. States Where Cannabis Is Illegal for Recreational Use**

| State          | Status                                                             |
|----------------|--------------------------------------------------------------------|
| Idaho          | ID Illegal for all purposes                                        |
| Indiana        | IN Illegal for all purposes                                        |
| Kansas         | KS Illegal for all purposes                                        |
| Kentucky       | KY Illegal for all purposes                                        |
| South Carolina | SC Illegal for all purposes                                        |
| South Dakota   | SD Illegal for all purposes                                        |
| Utah           | UT Illegal for all purposes                                        |
| Virginia       | VA Illegal for all purposes                                        |
| West Virginia* | WV Illegal for all purposes                                        |
| Wyoming        | WY Illegal for all purposes                                        |
| Missouri       | MO Illegal for all purposes; Decriminalized (first offense only)   |
| Nebraska       | NE Illegal for all purposes; Decriminalized (first offense only)   |
| North Carolina | NC Illegal for all purposes; Decriminalized (civil infraction)     |
| Alabama        | AL Legal for medical use only                                      |
| Arizona        | AZ Legal for medical use only                                      |
| Arkansas       | AR Legal for medical use only                                      |
| Florida        | FL Legal for medical use only                                      |
| Georgia        | GA Legal for medical use only                                      |
| Hawaii         | HI Legal for medical use only                                      |
| Iowa           | IA Legal for medical use only                                      |
| Louisiana      | LA Legal for medical use only                                      |
| Michigan       | MI Legal for medical use only                                      |
| Montana        | MT Legal for medical use only                                      |
| New Hampshire  | NH Legal for medical use only                                      |
| New Jersey     | NJ Legal for medical use only                                      |
| New Mexico     | NM Legal for medical use only                                      |
| North Dakota   | ND Legal for medical use only                                      |
| Oklahoma       | OK Legal for medical use only                                      |
| Pennsylvania   | PA Legal for medical use only                                      |
| Tennessee      | TN Legal for medical use only                                      |
| Texas          | TX Legal for medical use only                                      |
| Wisconsin      | WI Legal for medical use only                                      |
| Connecticut    | CT Legal for medical use only; Decriminalized (first offense only) |
| Delaware       | DE Legal for medical use only; Decriminalized (civil infraction)   |
| Illinois       | IL Legal for medical use only; Decriminalized (civil infraction)   |
| Maryland       | MD Legal for medical use only; Decriminalized (civil infraction)   |
| Minnesota      | MN Legal for medical use only; Decriminalized (petty misdemeanor)  |
| Mississippi    | MS Legal for medical use only; Decriminalized (first offense only) |
| New York       | NY Legal for medical use only; Decriminalized (civil infraction)   |
| Ohio           | OH Legal for medical use only; Decriminalized (civil infraction)   |
| Rhode Island   | RI Legal for medical use only; Decriminalized (civil infraction)   |
| Vermont        | VT Legal for medical use only; Decriminalized (civil infraction)   |

\*West Virginia Medical Cannabis Act has been signed into law but will not take effect until July 2019. Hence, we consider West Virginia as a control state with no policy change.

Note: In states that have decriminalized the possession of cannabis, there is typically no arrest or prison time for possessing a small amount for personal consumption. Penalties may vary as marked in parentheses.

### **Online Appendix III Procedure for Search Query Mining**

Below, we illustrate the steps and algorithms employed in the mining of cannabis-, alcohol- and tobacco-related queries. In this appendix, we do not distinguish between ‘words’ and ‘phrases’; and we use ‘keywords’ and ‘queries’ interchangeably.

The mining process of search queries follows three major steps:

Step (1): We manually compose a basic list of keywords related to cannabis, alcohol, and tobacco, respectively. For cannabis, we collect the keywords from online sources of cannabis lexicon on [thecannabist.co](http://thecannabist.co) and [marijuanadictionary.com](http://marijuanadictionary.com). This basic list of keywords serves as the ‘seed-list’ which we could further expand with steps (2) and (3). The seed-list for alcohol-related queries includes Wikipedia list of fermented (e.g., beer and wine) and distilled drinks (e.g., spirits and liqueurs) and their subcategories ([wikipedia.org/wiki/list\\_of\\_alcoholic\\_drinks](http://wikipedia.org/wiki/list_of_alcoholic_drinks)), cocktails ([wikipedia.org/wiki/list\\_of\\_cocktails](http://wikipedia.org/wiki/list_of_cocktails)), and alcohol brands ([wikipedia.org/wiki/category:alcoholic\\_drink\\_brands](http://wikipedia.org/wiki/category:alcoholic_drink_brands)). The tobacco seed-list includes Wikipedia list of tobacco product types ([wikipedia.org/wiki/tobacco\\_products](http://wikipedia.org/wiki/tobacco_products)) and the subcategories with each type, plus the list of tobacco brands including brands in each subcategory ([wikipedia.org/wiki/category:tobacco\\_brands](http://wikipedia.org/wiki/category:tobacco_brands)).

Step (2): We mine the search logs and represent each search query with a vector of real numbers. This step is often known as ‘word embedding’, ‘word2vec’, or ‘query2vec’ in particular because the words are actually queries in our context. The technique leverages the key feature of distributed-language-models (Mikolov et al. 2013; Turian et al. 2010) which have demonstrated success in Natural-Language-Processing (NLP) applications, and is applied in various AI tasks such as Question&Answer system (Shen et al. 2017), text topic modeling (Li et al. 2017) and sentiment classification (Kim 2014).

Specifically, our query2vec procedure follows the structure as described in Grbovic et al. (2016), which is further based on the Skip-gram model in Mikolov et al. (2013). We provide a simplistic introduction of the Skip-gram and query2vec models below.

The basic idea of the Skip-gram model (Mikolov et al. 2013) is to represent each word with a vector of numbers so that the word representations are useful to predict the surrounding words in a word sequence (e.g., a sentence or a document). Formally, given a sequence of words  $w_1, w_2, w_3, \dots, w_T$ , the objective of the models is to maximize the following log probability:

$$\frac{1}{T} \sum_{t=-1}^T \sum_{-c \leq j \leq c, j \neq 0} \log p(w_{t+j} | w_t) \quad (\text{A3.1}),$$

where  $c$  defines the ‘surrounding’ window. If we represent each word  $w$  with a vector  $v$ , then the basic Skip-gram model defines  $p(w_{t+j} | w_t)$  with the corresponding vectors as

$$p(w_j | w_i) = \frac{\exp(v'_j v_{w_i})}{\sum_{k=1}^K \exp(v'_k v_{w_i})} \quad (\text{A3.2}),$$

where  $K$  is the number of unique words in the dataset. By maximizing the objective function, each word is represented by its corresponding vector.

In the context of online activities (e.g., online searches), instead of a sequence of words in a sentence, we observe a sequence of activities (e.g., search queries) in an online session.

Hence, in line with the basic idea of the classic Skip-gram model, we can utilize an online activity to predict similar surrounding activities (Grbovic et al. 2016). Accordingly, we

maximize the objective function and represent each query  $w$  by the corresponding vector  $v$ .

Step (3): In this step, we utilize the ‘seed-list’ of queries as in step (1), and the vector

representation of queries as in step (2) to expand the query collection. Specifically, we define the distance between two queries to be the Euclidean distance between the corresponding vectors,

i.e.,

$$d(w_j, w_i) = \left\| v_{w_j} - v_{w_i} \right\|_2 \quad (\text{A3.3}).$$

For each query in the seed-list, we calculate its distances from the other queries, and find  $K$  ‘nearest neighbor’ queries with the smallest distances from the focal seed-list query<sup>1</sup>. We collect the neighbor queries of all the queries in the seed-list and perform manual data cleaning and deduplication. These neighbor queries, together with the queries in the seed-list, constitute the final query collection. Following the steps above, we obtain the query collections for cannabis, alcohol and tobacco, respectively.

### Additional References:

- Kim Y (2014). Convolutional neural networks for sentence classification. *Proceedings of the 2014 EMNLP*, 1746-51.
- Li C, Duan Y, Wang H, Zhang Z, Sun A, Ma Z (2017), Enhancing topic modeling for short texts with auxiliary word embeddings. *ACM Transactions on Information Systems (TOIS)*, 36(2), Article No.11.
- Shen H, Liu G, Wang H, Vithlani N (2017). SocialQ&A: An online social network based question and answer system. *IEEE Transactions on Big Data*, 3(1), 91-106.

**Table A3.1. Cannabis seed-list**

|                   |                 |                   |                |
|-------------------|-----------------|-------------------|----------------|
| 420               | Chocolate Thai  | Herb and Al       | Railroad weed  |
| A-bomb            | Christmas bud   | Honey blunts      | Rasta weed     |
| Acapulco gold     | Clickums        | Indian hay        | Red bud        |
| Acapulco red      | Cochornis       | Indian hemp       | Reefer         |
| Afgani indica     | Coliflor tostao | Indica            | Reefers        |
| African black     | Columbus black  | Indonesian bud    | Righteous bush |
| African bush      | Crack back      | Instaga           | Rompums        |
| African woodbine  | Crack bash      | Instagu           | Ruderalis      |
| Assassin of Youth | Crazy weed      | Jamaican gold     | Sasfras        |
| Astro turf        | Cripple         | Jamaican red hair | Sativa         |
| Atom bomb         | Crying weed     | Jay smoke         | Schwagg        |
| Atshitshi         | Cryppie         | Jive stick        | Sess           |
| Baby bhang        | Cryptonie       | Jolly green       | Sherman stick  |
| Bad seed          | Culican         | Joy smoke         | Sinsemilla     |
| Bambalacha        | Dagga           | Ju-ju             | Skunkweed      |
| Basuco            | Dawamesk        | Kalakit           | Smoke a bowl   |
| BC bud            | Diablito        | killer green bud  | Spliff         |
| Beedies           | Diambista       | Khayf             | Splim          |
| Belyando spruce   | Dimba           | Kief              | Sticky icky    |
| Bhang             | Dinkie dow      | Killer green bud  | Stink weed     |
| Black bart        | Dipped joints   | Killer weed       | Stoney weed    |

<sup>1</sup> We examined the expanded queries from various values of  $K$ , and selected  $K=30$  to ensure the comprehensiveness of the collection. Using  $K>30$  does not generate additional relevant and unduplicated queries. We also conducted robustness checks using queries identified with alternative  $K$  values (e.g.,  $K=25$ ) and found consistent conclusions.

|                     |                        |                  |                     |
|---------------------|------------------------|------------------|---------------------|
| Black ganga         | Dirt grass             | Kind bud         | Sugar weed          |
| Black gold          | Ditch weed             | King bud         | Takkouri            |
| Black gungi         | Djamba                 | Krippy           | Texas pot           |
| Black gunion        | Do a joint             | Kush             | Thai sticks         |
| Black mo/black moat | Dody                   | Lakbay diva      | Toke                |
| Black mote          | Don jem                | Laughing grass   | Toke up             |
| Blaxing             | Don Juan               | Laughing weed    | Trupence bag        |
| Blowing smoke       | Dona Juana (Spanish)   | Lime Green       | Unotque             |
| Blue de hue         | Dona Juanita (Spanish) | Liprimo          | Up against the stem |
| Blue sky blond      | Dope smoke             | Loco Weed        | Viper's weed        |
| Bo-bo               | Doradilla              | Locoweed         | Wacky weed          |
| Bobo bush           | Draf weed              | Loose shank      | Wake and Bake       |
| Bogart a joint      | Drag weed              | Love leaf        | Weed <sup>2</sup>   |
| Bohd                | Durong                 | Love weed        | Weed tea            |
| Boo boo bama        | Duros                  | Maconha          | Wet daddies         |
| Boot the gong       | Fallbrook redhair      | Magic smoke      | Wet sticks          |
| Bullyon             | Feed bag               | Manhattan silver | Whackatabacky       |
| Cam trip            | Fuma D'Angola          | Marijuana        | Wicky stick         |
| Cambodian red       | Ganja                  | Maui wauie       | Woo blunts          |
| Cam red             | Ganoobies              | Maui-wowie       | Woola blunt         |
| Canappa             | Gasper stick           | Mexican green    | Woolah              |
| Cancelled stick     | Gauge butt             | Mexican locoweed | Woolie blunt        |
| Candy blunt         | Giggle smoke           | Mexican red      | Woolies             |
| Cannabis            | Giggle weed            | Mighty mezz      | Wooly blunts        |
| Cannabis tea        | Go loco                | Mohasty          | Yen pop             |
| Carmabis            | Goblet of jam          | moocah           | Yerhia              |
| Cartucho            | Gonj                   | Oolies           | Yesca               |
| Cavite all star     | Good giggles           | P-dogs           | Zacatecas purple    |
| Charas              | Goof butt              | Pack a bowl      |                     |
| Cheeba              | Green buds             | Pakaloco         |                     |
| Cheeo               | Green goddess          | Pakalolo         |                     |
| Chemo               | Grifa                  | Pakistani black  |                     |
| Chiba chiba         | Griffa                 | Panama red       |                     |
| Chicago black       | Gunja                  | Paper blunts     |                     |
| Chicago green       | Hanhich                | Philly blunts    |                     |
| Chiefing            | Happy cigarette        | Potten bush      |                     |
| Chillum             | Hawaiian Black         | Pretendica       |                     |
| Chira               | Hawaiian homegrown hay | Ragweed          |                     |

**Table A3.2. Alcohol seed-list**

|                    |                   |                  |                 |
|--------------------|-------------------|------------------|-----------------|
| 10 Cane            | Carling           | Jagertee         | Planter's Punch |
| 100 Pipers         | Casa Dragonos     | James E. Pepper  | Plum jerkum     |
| 2 Towns Ciderhouse | Casamigos         | Jameson Irish    | Poire Williams  |
| 4 Copas            | Castel Group      | Japanese Slipper | Poitín          |
| 7 & 7              | Cement Mixer shot | Jim Beam         | Popov           |

<sup>2</sup> The word “weed” is a homonym with two meanings: while it is most commonly used to refer to cannabis, it also means valueless wild grass. The fraction of searches for the other meaning of “weed” does not affect our results under the difference-in-difference framework for the following reason. Denote the searches for the word “weed” for cannabis-related information before and after RCL as  $S_{\text{cannabis}}^{\text{before}}$  and  $S_{\text{cannabis}}^{\text{after}}$ , respectively; and the searches by people interested in its other meaning unrelated to cannabis as  $S_{\text{other}}^{\text{before}}$  and  $S_{\text{other}}^{\text{after}}$ . The difference in the total volume of searches for the word “weed” before and after RCL will be  $(S_{\text{cannabis}}^{\text{after}} + S_{\text{other}}^{\text{after}}) - (S_{\text{cannabis}}^{\text{before}} + S_{\text{other}}^{\text{before}}) \approx S_{\text{cannabis}}^{\text{after}} - S_{\text{cannabis}}^{\text{before}}$  because  $S_{\text{other}}^{\text{after}} \approx S_{\text{other}}^{\text{before}}$  (there is no theoretical reason to believe that people’s interest in other meanings of the word “weed” that are unrelated to cannabis would change significantly after RCL).

---

|                               |                        |                       |                       |
|-------------------------------|------------------------|-----------------------|-----------------------|
| Aberfeldy                     | Chalone Vineyard       | Johnnie Walker        | Porchcrawler          |
| Aberlour distillery           | Chambord               | Jolly Shandy          | Porto flip            |
| Ableforth's                   | Champagne              | Jose Cuervo           | Prosecco              |
| Absinthe                      | Chardonnay             | Joseph Schlitz        | Quentão               |
| Absolut                       | Charles Shaw           | Juan Collins          | Rabo-de-galo          |
| Ace Cider                     | Cheeky Vimto           | Jungle Juice          | Raki                  |
| Adonis                        | Chenin blanc           | Jupiler               | Rakia                 |
| Adrianna Vineyard             | Chicha                 | Justerini & Brooks    | Rebujito              |
| Adult shake                   | Chivas Regal           | Kahlúa                | Red Bicycleette       |
| Advocaat and soda<br>lemonade | Cider                  | Kalimotxo             | Red Russian           |
| Agua de Sevilla               | Cîroc                  | Kaoliang wine         | Red wine              |
| Agua de Valencia              | Cockspur Rum           | Karsk                 | Redbreast             |
| Agua loca                     | Cocktail               | Kentucky Vintage      | Redheaded slut        |
| Aguaymanto Sour               | Cognac                 | Ketel One             | Riesling              |
| Agwa de Bolivia               | Cojito                 | Kilju                 | Riunite               |
| Akvavit                       | Alcopops               | Killian's             | Rohrbach              |
| Alabama Slammer               | Concha y Toro          | Kingfisher beer       | Rolling Rock          |
| Albarino                      | Controy                | Kir                   | Ron Zacapa Centenario |
| Alcohol                       | Coors                  | Kirsch                | Rossini               |
| Ale                           | Corona                 | Knockando             | rotgut                |
| Alizé                         | Corpse Reviver #2      | Korbel                | Rowan's Creek         |
| Allied Domecq                 | Cragganmore            | Kremlin Colonel       | Royal Lochnagar       |
| Amber Moon                    | Cremat                 | Kubuli                | Royal Salute          |
| AmberBock                     | Crème de menthe        | Labatt                | Rum                   |
| Amstel                        | Crested Ten            | Lagavulin             | Rumple Minze          |
| Angel Face                    | Cristal                | Lager                 | Ruskova               |
| Angry Orchard                 | Crown Royal            | Lagunitas             | Rusty Nail            |
| Anheuser-Busch                | Cruzan                 | Lambrini              | Sahti                 |
| Aperol Spritz                 | Cuauhtémoc Moctezuma   | Le Tourment Vert      | Sake                  |
| Applejack                     | Cuba Libre             | Leblon Cachaça        | Salmiakki Koskenkorva |
| Apple-Kneel                   | Cuban Sunset           | Leffe                 | Salty Dog             |
| Appletini                     | Curacao Punch          | Leite de Onça         | Samuel Adams          |
| Arak                          | Daiquiri               | Lemon Drop            | Sangiovese            |
| Arbor Mist                    | Dalmore                | Leopard's Leap        | Sangria               |
| Arette                        | Dalwhinnie             | Lillet                | Sauvignon blanc       |
| Armagnac                      | Damassine              | Lime Rickey           | Savoy Corpse Reviver  |
| Armand de Brignac             | Damn the Weather       | Liqueur               | Sazerac               |
| Arrack                        | Dark 'N' Stormy        | Liquor                | Schwarzbier           |
| Arsenal Cider House           | Death in the Afternoon | Long Island Iced Tea  | Scotch                |
| Artois Bock                   | DeKuyper               | Longmorn              | Screaming Orgasm      |
| Avión                         | Desi daru              | Löwenbräu             | Screwdriver           |
| Awamori                       | Dewar's                | Luksusowa             | Scrumpy Jack          |
| Baby Guinness                 | Diageo                 | Lunazul               | Seagram               |
| Babycham                      | Disaronno              | Lynchburg Lemonade    | Señor Río             |
| Bacardi                       | Distillery             | Ma La Sun             | Seven and Seven       |
| Backdraft                     | Dogfish Head           | Macieira              | Sex on the Beach      |
| Baijiu                        | Dom Pérignon           | Mackeson              | Shandy                |
| Baileys Irish Cream           | Dommelsch              | Macuá                 | Sheridan's            |
| Ballantine's                  | Don Julio              | Maerzen               | Sherry                |
| Barbera                       | dos equis              | Maestro Dobel Tequila | Shiraz                |
| Barleywine                    | Drambuie               | Magic Hat             | Shochu                |
| Batida                        | drinks                 | Mai-Tai               | Shock Top             |
| Bay Breeze                    | Dubonnet               | Malbec                | Sierra Nevada         |
| Beamish and Crawford          | Duck Fart              | Malesan               | Singani               |
| Beam's Eight Star             | Early Times            | malt                  | Singapore Sling       |

---

|                       |                                    |                    |                   |
|-----------------------|------------------------------------|--------------------|-------------------|
| Beaulieu Vineyard     | Ecco Domani                        | Mamajuana          | Sirop de Picon    |
| Becherovka            | El Presidente                      | Mango Sour         | Skittle Bomb      |
| Beer                  | El Toro Loco Patron and<br>Redbull | Manischewitz       | SKYY              |
| Bellini               | Elijah Craig                       | ManX Spirit        | Slammer Royale    |
| Bénédictine           | Elysian                            | Maotai             | Slippery Nipple   |
| Bernheim Original     | Emperador                          | Margarita          | Slivovitz         |
| Bijou                 | Eristoff                           | Martell            | Smirnoff          |
| Birra Moretti         | Espolon                            | Martini            | Soju              |
| Black and Tan         | Evan Williams                      | Mateus             | Sparkling wine    |
| Black Nail            | Fat Head's                         | Mauresque          | Spirits           |
| Black Russian         | Ferrari Spumante                   | McDowell's No.1    | Springbokkie      |
| Black Velvet          | Finlandia (vodka)                  | Mead               | Spritzer          |
| Black Warrior         | fireball                           | Merlot             | St. Ides          |
| Blackthorn            | firewater                          | Metaxa             | Staropramen       |
| Blenders Pride        | Fish House Punch                   | Mezcal             | Steel Reserve     |
| Bloody Aztec          | Fizzy apple                        | Michelada          | Stella Artois     |
| Bloody Margaret       | Flaming Dr Pepper                  | Michelob           | Stolichnaya       |
| Bloody Mary           | Flaming Sambuca                    | Midleton Very Rare | Stones Bitter     |
| Blow my Skull Off     | Flaming Volcano                    | Midori Sour        | Stout             |
| Blue Hawaii           | Flirtini                           | Miller Lite        | Strathisla        |
| Blue Lagoon           | Flor de Caña                       | Milwaukee's Best   | Strongbow         |
| Blue Moon             | Four Peaks                         | Mimosa             | Suze              |
| Blue Nun              | Franzia                            | Mint Julep         | SweetWater        |
| Bobby Burns           | French 75                          | Moët & Chandon     | Swish Beverages   |
| Bock                  | Fuzzy Navel                        | Mojito             | Sylvaner          |
| Boddingtons Bitter    | G. H. Mumm                         | Moloko Plus        | Syrah             |
| Bodega Catena Zapata  | Gammel Dansk                       | Molson             | Talisker          |
| Boilermaker           | Garnacha                           | Monkey Gland       | Tamagozake        |
| Bols                  | Genesee                            | Moonshine          | Tanqueray         |
| Bombay Sapphire       | George Dickel                      | Moscato            | Tavernello        |
| Bombo                 | Get 27                             | Moscow Mule        | Tempranillo       |
| Booze                 | Gewurztraminer                     | Mousel             | Tepache           |
| Bonarda               | Gimlet                             | Mouton Cadet       | Tequila           |
| Boschendal            | Gin                                | Mudslide           | The Glenlivet     |
| Boulevardier          | Ginza Mary                         | Mützig             | Three Olives      |
| Boundary Bay          | Gireau                             | National Bohemian  | Ti' Punch         |
| Bourbon               | Glen Elgin                         | Natural Ice        | Tia Maria         |
| Bourbon Lancer        | Glen Ord                           | Natural Light      | Tinto de Verano   |
| Bramble               | Glenkinchie                        | Nebbiolo           | Tiswin            |
| Brandy                | Glögg                              | Negroni            | Tom Collins       |
| Brass Monkey          | Glowtini                           | New Albanian       | Trapiche          |
| Brasserie Saint James | Golden Dream                       | New Midleton       | Tschunk           |
| Brewery               | Goldschläger                       | Nihamanchi         | Tubi 60           |
| Brewing               | Grain Belt                         | Noah's Mill        | Țuică             |
| Brexitovka            | Grand Old Parr                     | Noilly Prat        | Vat 69            |
| Brown-Forman          | Green Vesper                       | Ogogoro            | Vermouth          |
| Buchanan's            | Grenache                           | Old Bushmills      | Vesper            |
| Buck's Fizz           | Grey Goose                         | Old Fitzgerald     | Veuve Clicquot    |
| Bud Extra             | Grog                               | Old Forester       | Vinsanto          |
| Bud Ice               | H. P. Bulmer                       | Old Grand-Dad      | Viognier          |
| Bud light             | Hamlin's Wizard Oil                | Old Milwaukee      | Vladivar          |
| Bud Silver            | Hangman's Blood                    | Olde English 800   | Vodka             |
| Budweiser             | Hanky-Panky                        | Olmecca            | Ward 8            |
| Bull Shot             | Hardenberg-Wilthen                 | Orange Safari      | West Coast Cooler |
| Bulleit               | Harrogate Nights                   | Oranjeboom         | Weyerbacher       |

|                    |                   |                   |                            |
|--------------------|-------------------|-------------------|----------------------------|
| Bulmers            | Harvey Wallbanger | Ouzini            | Wheat beer                 |
| Bumbo              | Havana Club       | Ouzo              | Whiskey                    |
| Bumboo             | Heaven Hill       | Pabst Blue Ribbon | Whisky                     |
| Bundaberg          | Heineken          | Palinka           | White Claw Hard Seltzer    |
| Burgasko           | Hennchata         | Paloma            | White Mountain Cooler      |
| Busch              | Hennessy          | Palomino          | White Russian              |
| Bushwacker         | Herbsaint Frappé  | Pastis            | White wine                 |
| Buttery Nipple     | Himbeergeist      | Paul John         | Whyte & Mackay             |
| Byejoe             | hootch            | Peeterman Artois  | Williamine                 |
| Byrrh              | Horilka           | Pegu              | Wine                       |
| Cabernet franc     | Horse's Neck      | Pernod Fils       | Witbier                    |
| Cabernet sauvignon | HpnotiQ           | Pernod Ricard     | Wodka Gorbatschow          |
| Cabin Still        | Huangjiu          | Perrier-Jouët     | Woodford Reserve           |
| Cachaça            | Hudepohl          | Peter Scot        | Worthington's White Shield |
| Cacique Guaro      | Ice Harbor        | Phillips Union    | Wyborowa                   |
| Caipirinha         | InBev             | Pilsener          | Yanjing                    |
| Caipiroska         | indian pale ale   | Pils              | Yellow Tail                |
| Caipivodka         | IPA               | pilsner           | Yorsh                      |
| Caju Amigo         | Irish Car Bomb    | Pimm's            | Yuengling                  |
| California Cooler  | Irish coffee      | Piña Colada       | Yukon Jack                 |
| Calvert Extra      | J. P. Chenet      | Pink Lady         | Zagorka                    |
| Canadian Mist      | J.P. Wiser's      | Pinit grigio      | Zhumir                     |
| Caol Ila           | J.T.S. Brown      | Pinot gris        | Ziegenbock                 |
| Captain Morgan     | Jack and Coke     | Pinot noir        | Zinfandel                  |
| Cardhu             | Jack Daniel's     | Pinotage          | Zlaty Bazant               |
| Caribou Lou        | Jägerbomb         | Pisco             | Zurracapote                |

**Table A3.3. Tobacco seed-list**

|                       |                       |                        |                          |
|-----------------------|-----------------------|------------------------|--------------------------|
| Absolute Mild         | Dipping tobacco       | La Flor Dominicana     | Richmond cigarette       |
| Access Mild           | Dissolvable tobacco   | La Gloria Cubana       | Rio Tabac Alpha Series   |
| Akhtamar              | Djarum Black          | La Palina              | Rocky Patel Premium      |
| Alain Delon           | Djarum Vanilla        | Lambert & Butler       | Röda Lacket              |
| Alec Bradley          | Dji Sam Soe 234       | Lark cigarette         | Roll-Your-Own            |
| Amber Leaf            | Dokha                 | LD cigarette           | Romeo y Julieta          |
| Anti-Semit            | Domenico cigar        | Legend cigarette       | Rothmans cigarette       |
| Apache                | Dominant cigarette    | Levi Garrett           | Royal cigarette          |
| Ararat                | Don Pepin Garcia      | Liggett Select         | Saat cigarette           |
| Aristoff              | Doral cigarette       | Longbeach cigarette    | Saint Luis Rey           |
|                       | Double happiness      |                        |                          |
| Arturo Fuente         | cigarette             | Lucky Strike cigarette | Sakura cigarette         |
| Ashford               | Drum tobacco          | Macanudo               | Salem cigarette          |
| Avolution             | Du Maurier cigarette  | Mahala Problem         | Sampoerna Hijau          |
|                       |                       |                        | San Cristobal de la      |
| Bahman                | Duke cigarette        | Makla                  | Habana cigar             |
| Bali Shag             | Dunhill cigarette     | Marlboro               | Sancho Panza cigar       |
| Basic cigarette       | Dutch Masters         | Marsh Wheeling         | Sancti Spiritus cigar    |
| Belomorkanal          | Eclipse cigarette     | Maverick cigarette     | Scissors cigarette       |
| Benson & Hedges       | El Rey de los Habanos | Max cigarette          | Senior Service cigarette |
| Bentoel               | El Rey del Mundo      | Maxus cigarette        | Seven Stars cigarette    |
| Berkeley cigarette    | Elita cigarette       | Mayfair cigarette      | Shiazo                   |
| Bigger Hair           | Embassy cigarette     | Memphis cigarette      | Signature 1932           |
| Bintang Buana         | Envio Mild            | Merit cigarette        | Signature Select         |
| Black & Mild          | EO Premium 601 Serie  | Mevius                 | Silk Cut cigarette       |
| Bolívar               | Ernte 23              | Mighty cigarette       | Skoal                    |
| Bond Street cigarette | Esse cigarette        | Minak Djinggo          | Skruf Snus               |

|                        |                        |                            |                       |
|------------------------|------------------------|----------------------------|-----------------------|
| Borkum Riff            | Ettan snus             | Misty cigarette            | Snuff                 |
| Bow Tie Cigar Company  | Eve cigarette          | Mocne cigarette            | Snus                  |
| Brick House cigar      | Everest cigarette      | Montecristo                | Sobranie              |
| Bristol cigarette      | Extreme Mild cigarette | More cigarette             | State Express 555     |
| Bucanero cigar         | f6 cigarette           | MS cigarette               | Sterling cigarette    |
| Bugler tobacco         | Fatima cigarette       | Mu'assel                   | Stoker's              |
| Bull Durham tobacco    | Flair cigarette        | Muratti                    | Superkings            |
| Cabaiguán cigar        | Fonseca cigar          | Nacionales W               | Surya Pro Mild        |
| Camacho Cigars         | Fortuna cigarette      | Naswar                     | Sweet Afton cigarette |
| Cambridge cigarette    | Four Square curlies    | Nat Sherman                | Swisher Sweets        |
| Camel                  | Fuente Fuente OpusX    | Natural American Spirit    | Taj Chhap Deluxe      |
| Canadian Classics      | Fumadores              | Navy Cut                   | Tali Jagat cigarette  |
| Capri cigarette        | Galan cigar            | Neo Mild                   | Tareyton              |
| Capstan cigarette      | Garni cigarette        | Neslite                    | Tatuaje               |
| Captain Black cigar    | Gauloises              | Newport cigarette          | Thang Long            |
| Carroll's cigarette    | Gawith Apricot         | Next cigarette             | Time cigarette        |
| Caster cigarette       | Gispert                | Niemeyer tobacco           | Tiparillo             |
| Cavanders cigarette    | Gitanes                | Nil cigarette              | Tipper cigarette      |
| Champion cigarette     | Gletscher Prise        | Noblesse cigarette         | Tobacco               |
| Chancellor cigarette   | Gold Flake cigarette   | North Pole cigarette       | Tobacco edibles       |
| Charminar cigarette    | Golden Bat cigarette   | Old Henry cigar            | Toscano cigar         |
| Charms cigarette       | Golden Virginia        | Oliva Cigar                | Trinidad cigar        |
| Chesterfield cigarette | Göteborgs Rapé         | Oliver Twist Tobacco       | Troya cigar           |
| Chewing tobacco        | Grizzly tobacco        | Padilla Habano             | TRUE cigarette        |
| Chunghwa cigarette     | GT cigarette           | Padilla Hybrid             | U Mild                |
| Cigarettes             | Guantanamo cigar       | Padilla Maduro             | Vantage cigarette     |
| Cigars                 | Gudang Garam           | Padilla Miami              | Vegas Cubanas         |
| Clas Mild              | Gutka                  | Pall Mall                  | Vegas Robaina         |
| Classic Filter Kings   | H. Upmann              | Parisienne cigarette       | Vegueros              |
| Clavo cigarette        | Habana Leon            | Parliament cigarette       | Viceroy cigarette     |
| Cleopatra cigarette    | Habanos                | Partagás                   | Virginia Slims        |
| Club cigarette         | Hamlet cigar           | Paul Garmirian             | Vogue cigarette       |
| Club Mild              | Havana Soul cigar      | Peace cigarette            | West cigarette        |
| Cohiba                 | Haus Bergmann          | Perdomo                    | White Owl             |
| Connoisseur Selection  | Henry Clay cigar       | Peter Stuyvesant cigarette | White Ox tobacco      |
| Cool cigarette         | Hestia Tobacco         | Phillies cigar             | Wills Navy Cut        |
| Copenhagen snuff       | Hirsh y Garcia         | Piloto Cigars              | Winfield cigarette    |
| Cornell & Diehl        | Hollywood cigarette    | Pipe tobacco               | Winston cigarette     |
| Corojo Label           | Hongtashan             | Newport Platinum           | Wismilak              |
| Country cigarette      | Hope cigarette         | Por Larrañaga              | Woodbine cigarette    |
| Craven A               | Hoyo de Monterrey      | Prince cigarette           | Ziganov               |
| Creamy snuff           | Insignia cigarette     | Prince Albert tobacco      |                       |
| Crossroads cigarette   | Iqmik                  | Pueblo cigarette           |                       |
| Crystal cigarette      | Java cigarette         | Punch cigar                |                       |
| Cuaba                  | Jazy Mild              | Pyramid cigarette          |                       |
| Cuban Diplomat cigar   | John Player & Sons     | Quai d'Orsay cigar         |                       |
| Cuesta-Rey             | Joya de Nicaragua      | Quintero cigar             |                       |
| Cutters Choice         | Juan López cigar       | Rambler cigarette          |                       |
| Dakota cigarette       | Karo cigarette         | Ramón Allones              |                       |
| Dannemann              | Kent cigarette         | Red & White cigarette      |                       |
| Davidoff               | Kodiak tobacco         | Red Man Chew               |                       |
| Deluxe Tenor cigarette | Kool cigarette         | Regal cigarette            |                       |
| Derby cigarette        | Krong Thip             | Regent cigarette           |                       |
| Diamond Crown          | L&M                    | Rey Miguel cigar           |                       |
| Diplomáticos           | L.A. Lights cigarette  | Reyes Family cigar         |                       |

**Online Appendix IV  
Summary Statistics**

---

|                                                              |                               |
|--------------------------------------------------------------|-------------------------------|
| Substance search volume ratio (cannabis : alcohol : tobacco) | 100 (baseline) : 255.2 : 83.4 |
| Ad clickthrough rate ratio (alcohol : tobacco)               | 100 (baseline) : 86.0         |
| Ad revenue per impression ratio (alcohol : tobacco)          | 100 (baseline) : 64.9         |
| Percentage of youth                                          | 6.1%                          |
| Percentage of female                                         | 48.6%                         |
| Percentage of Device1 (tablet)                               | 7.9%                          |
| Percentage of Device2 (mobile phone)                         | 15.3%                         |

---

**Online Appendix V**  
**Model Estimation with Expanded Control Group**

In the main analysis, we use the states without any cannabis policy change as control states. As a robustness check, we re-estimate Equations (1) and (2) after including the data from all the other states listed in Online Appendix II. Because these additional states have undergone some sorts of cannabis policy changes (i.e., medical cannabis legalization or MCL, and/or decriminalization), we account for the effects of these policy changes by adding control variables in Equations (1) and (2) (a dummy indicator  $MCL_k \times Post_{j|k}$  that becomes 1 for state  $k$  after medical cannabis is legalized in that state, and a dummy indicator  $Decriminalized_k \times Post_{j|k}$  that becomes 1 after cannabis is decriminalized). As reported in Table A5 below, the estimated treatment effects of RCL (coefficients of  $Treat \times Post$ ) and the moderating effects of *Youth* (coefficients of  $Treat \times Post \times Youth$ ) remain robust under this specification.

**Table A5.**

| DV                      | IDV                 | Coefficient               |                           |
|-------------------------|---------------------|---------------------------|---------------------------|
|                         |                     | Estimated from Equation 1 | Estimated from Equation 2 |
| Cannabis search         | Treat×Post          | .0745***<br>(.0067)       | .0881***<br>(.0140)       |
|                         | Treat×Post×Youth    |                           | -.1424***<br>(.0249)      |
|                         | Decriminalized×Post | .0009<br>(.0084)          | .0012<br>(.0175)          |
|                         | MCL×Post            | .0134*<br>(.0069)         | .0247*<br>(.0144)         |
| Alcohol search          | Treat×Post          | -.1037***<br>(.0126)      | -.1149***<br>(.0211)      |
|                         | Treat×Post×Youth    |                           | .1585***<br>(.0349)       |
|                         | Decriminalized×Post | -.0113<br>(.0154)         | -.0126<br>(.0260)         |
|                         | MCL×Post            | -.0187<br>(.0127)         | -.0218<br>(.0214)         |
| Alcohol ad clickthrough | Treat×Post          | -.0094***<br>(.0015)      | -.0111***<br>(.0026)      |
|                         | Treat×Post×Youth    |                           | .0196***<br>(.0042)       |
|                         | Decriminalized×Post | -.0005                    | -.0007                    |

|                                           |                     |                              |                              |
|-------------------------------------------|---------------------|------------------------------|------------------------------|
|                                           | MCL×Post            | (.0018)<br>-.0006<br>(.0015) | (.0031)<br>-.0009<br>(.0026) |
| Publisher's<br>revenue from<br>alcohol ad | Treat×Post          | -.0036***<br>(.0011)         | -.0042**<br>(.0019)          |
|                                           | Treat×Post×Youth    |                              | .0058*<br>(.0031)            |
|                                           | Decriminalized×Post | -.0005<br>(.0014)            | -.0009<br>(.0023)            |
|                                           | MCL×Post            | -.0013<br>(.0011)            | -.0016<br>(.0019)            |
| Tobacco search                            | Treat×Post          | .0238***<br>(.0041)          | .0316***<br>(.0063)          |
|                                           | Treat×Post×Youth    |                              | -.0474***<br>(.0140)         |
|                                           | Decriminalized×Post | .0052<br>(.0049)             | .0060<br>(.0076)             |
|                                           | MCL×Post            | .0074*<br>(.0040)            | .0079<br>(.0063)             |
| Tobacco ad<br>clickthrough                | Treat×Post          | .0121***<br>(.0030)          | .0148***<br>(.0039)          |
|                                           | Treat×Post×Youth    |                              | -.0364***<br>(.0083)         |
|                                           | Decriminalized×Post | .0039<br>(.0036)             | .0044<br>(.0047)             |
|                                           | MCL×Post            | .0016<br>(.0029)             | .0017<br>(.0039)             |
| Publisher's<br>revenue from<br>tobacco ad | Treat×Post          | .0023*<br>(.0012)            | .0024<br>(.0016)             |
|                                           | Treat×Post×Youth    |                              | -.0030<br>(.0034)            |
|                                           | Decriminalized×Post | .0022<br>(.0014)             | .0024<br>(.0019)             |
|                                           | MCL×Post            | .0020*<br>(.0012)            | .0021<br>(.0016)             |

Note: Other variables specified in Equations (1) and (2) are also included. Three, two, and one asterisks indicate 1%, 5%, and 10% statistical significance (two-tailed), respectively. We analyze aggregated data on population group level over time and the number of observations is 102,312.

## Online Appendix VI

### Alternative Model Specification - Estimating Treatment Effect for Each State Separately

Instead of estimating a staggered/pooled model, we also estimate the treatment effect for each RCL state separately. For each treated state, we specify the model below following the literature (e.g., Chen et al. 2017),

$$Y_{ijk} = \beta_0 + \beta_1 Treat_k + \beta_2 Post_j + \beta_3 Treat_k \times Post_j + \beta_4 Youth_i + \beta_5 Gender_i + \beta_6 Device_{1i} + \beta_7 Device_{2i} + \beta_8 Treat_k \times Youth_i + \beta_9 Post_j \times Youth_i + \beta_{10} Treat_k \times Post_j \times Youth_i + \varepsilon_{ijk} \quad (A6.1)$$

where *Treat* is a dummy variable that equals one for the treated state, and zero for control states; *Post* is a dummy variable that equals one for the period after the policy change in the treated state, and zero for the period before policy change. All the other variables share the same meanings as those in Equation (2). We estimate Equation (A6.1) for one treated state at a time, using weekly population-group level panel data during a 24-week window (12 weeks before and 12 weeks after the policy change in the treated state) across the treated state and the control states (the ten states without any cannabis policy change). The coefficient  $\beta_3$  of the interaction term *Treat* $\times$ *Post* captures the effect of the policy change (i.e., RCL) on Y for adults (the baseline age group, when *Youth*=0);  $\beta_{10}$  of the three-way interaction term *Treat* $\times$ *Post* $\times$ *Youth* reflects the differential treatment effect for the youth versus adults. Tables A6.1 and A6.2 below summarize the results.

Table A6.1. Effect of RCL on Cannabis Search

| Variables                             | Coefficients (Standard Error) |                   |                      |                    |                    |                    |                     |
|---------------------------------------|-------------------------------|-------------------|----------------------|--------------------|--------------------|--------------------|---------------------|
|                                       | AK                            | CA                | DC                   | ME                 | MA                 | NV                 | OR                  |
| Treat $\times$ Post                   | .0726***<br>(.0237)           | .0845<br>(.1688)  | .0484**<br>(.0217)   | .0127<br>(.2407)   | .4014**<br>(.1899) | .3740**<br>(.1642) | .1498**<br>(.0759)  |
| Treat $\times$ Post<br>$\times$ Youth | -.1554***<br>(.0393)          | -.2500<br>(.2860) | -.1903***<br>(.0349) | -1.2741<br>(.7855) | -.0996<br>(.3706)  | -.4923<br>(.3347)  | -.2552**<br>(.1173) |

Note: Other variables specified in Equation (A6.1) are also included. Three, two, and one asterisks indicate 1%, 5%, and 10% statistical significance (two-tailed), respectively. We analyze aggregated data on population group level over time and the number of observations is 3,168.

Table A6.2. Effect of RCL on Alcohol and Tobacco Industries

| Outcome                                            | Variables        | Coefficients (Standard Error) |                     |                      |                     |                     |                     |                      |
|----------------------------------------------------|------------------|-------------------------------|---------------------|----------------------|---------------------|---------------------|---------------------|----------------------|
|                                                    |                  | AK                            | CA                  | DC                   | ME                  | MA                  | NV                  | OR                   |
| Alcohol search volume                              | Treat×Post       | -.0901**<br>(.0374)           | -.1314<br>(.2088)   | -.1329***<br>(.0357) | -.1273<br>(.1996)   | -.0713<br>(.1999)   | -.2906*<br>(.1699)  | -.1934*<br>(.1046)   |
|                                                    | Treat×Post×Youth | .2281***<br>(.0602)           | .1066<br>(.3410)    | .0984*<br>(.0537)    | .3751<br>(.5052)    | .7207**<br>(.3494)  | .2744<br>(.3134)    | .0406<br>(.1543)     |
| Clickthrough-rate of alcohol ads                   | Treat×Post       | -.0203***<br>(.0061)          | -.0164**<br>(.0077) | -.0157**<br>(.0062)  | -.0142<br>(.0091)   | -.0124<br>(.0091)   | -.0104<br>(.0090)   | -.0154**<br>(.0063)  |
|                                                    | Treat×Post×Youth | .0275***<br>(.0098)           | .0085<br>(.0123)    | .0092<br>(.0093)     | .0448**<br>(.0195)  | .0007<br>(.0151)    | -.0023<br>(.0160)   | .0260***<br>(.0092)  |
| Publisher's revenue-per-impresion from alcohol ads | Treat×Post       | -.0047<br>(.0089)             | -.0158<br>(.0128)   | -.0122**<br>(.0061)  | -.0016<br>(.0143)   | .0055<br>(.0133)    | -.0047<br>(.0124)   | -.0165*<br>(.0099)   |
|                                                    | Treat×Post×Youth | .0075<br>(.0143)              | .0339*<br>(.0204)   | .0088<br>(.0091)     | -.0061<br>(.0308)   | -.0227<br>(.0221)   | .0061<br>(.0222)    | .0252*<br>(.0146)    |
| Tobacco search volume                              | Treat×Post       | .0217<br>(.0152)              | .0566**<br>(.0286)  | .0459***<br>(.0141)  | .0345<br>(.2859)    | .0719<br>(.1309)    | .0727<br>(.2715)    | .0491**<br>(.0214)   |
|                                                    | Treat×Post×Youth | -.0612*<br>(.0337)            | -.1394**<br>(.0603) | -.0769***<br>(.0255) | -1.2078<br>(1.4042) | -.9230**<br>(.4172) | -1.3840<br>(1.0710) | -1.1088**<br>(.0434) |
| Clickthrough-rate of tobacco ads                   | Treat×Post       | .0373***<br>(.0078)           | .0181*<br>(.0095)   | .0246***<br>(.0075)  | .0534***<br>(.0136) | .0302**<br>(.0125)  | .0457***<br>(.0143) | .0128<br>(.0090)     |
|                                                    | Treat×Post×Youth | -.0765***<br>(.0170)          | -.0292<br>(.0178)   | -.0513***<br>(.0135) | -.0565<br>(.0504)   | -.0125<br>(.0324)   | -.0744**<br>(.0352) | -.0202<br>(.0183)    |
| Publisher's revenue-per-impresion from tobacco ads | Treat×Post       | .0148**<br>(.0063)            | -.0113<br>(.0114)   | .0084<br>(.0062)     | .0186*<br>(.0104)   | -.0035<br>(.0085)   | .0023<br>(.0102)    | .0035<br>(.0062)     |
|                                                    | Treat×Post×Youth | -.0439***<br>(.0138)          | -.0015<br>(.0214)   | -.0002<br>(.0112)    | -.0202<br>(.0388)   | .0169<br>(.0221)    | -.0088<br>(.0250)   | .0122<br>(.0125)     |

Note: Other variables specified in Equation (A6.1) are also included in the model. Three, two, and one asterisks indicate 1%, 5%, and 10% statistical significance (two-tailed), respectively. We analyze aggregated data on population group level over time and the number of observations is 3,168.

**Online Appendix VII**  
**Robustness Check with Two-way Clustered Standard Errors**

In this appendix, we check the robustness of the results by employing two-way clustered standard errors (SEs), which allows clustering both by state and by time (week), following Cameron et al. (2011).

**Table A7. Estimation results with two-way robust clustered SEs**

| DV                                  | IDV              | Coefficient               |                           |
|-------------------------------------|------------------|---------------------------|---------------------------|
|                                     |                  | Estimated from Equation 1 | Estimated from Equation 2 |
| Cannabis search                     | Treat×Post       | .0721***<br>(.0094)       | .0837***<br>(.0188)       |
|                                     | Treat×Post×Youth |                           | -.1613***<br>(.0309)      |
| Alcohol search                      | Treat×Post       | -.1194***<br>(.0154)      | -.1383***<br>(.0268)      |
|                                     | Treat×Post×Youth |                           | .1605***<br>(.0383)       |
| Alcohol ad clickthrough             | Treat×Post       | -.0098***<br>(.0020)      | -.0112***<br>(.0036)      |
|                                     | Treat×Post×Youth |                           | .0169***<br>(.0052)       |
| Publisher's revenue from alcohol ad | Treat×Post       | -.0050***<br>(.0016)      | -.0055**<br>(.0025)       |
|                                     | Treat×Post×Youth |                           | .0063*<br>(.0036)         |
| Tobacco search                      | Treat×Post       | .0285***<br>(.0077)       | .0308***<br>(.0111)       |
|                                     | Treat×Post×Youth |                           | -.0712**<br>(.0310)       |
| Tobacco ad clickthrough             | Treat×Post       | .0131***<br>(.0047)       | .0159***<br>(.0058)       |
|                                     | Treat×Post×Youth |                           | -.0333***<br>(.0117)      |
| Publisher's revenue from tobacco ad | Treat×Post       | .0029*<br>(.0017)         | .0031<br>(.0024)          |
|                                     | Treat×Post×Youth |                           | -.0038<br>(.0044)         |

Note: Other variables specified in Equations 1 and 2 are also included. Three, two, and one asterisks indicate 1%, 5%, and 10% statistical significance (two-tailed), respectively. We analyze aggregated data on population group level over time and the number of observations is 35,496.

*Additional Reference:*

Cameron C, Gelbach J, Miller D (2011). Robust inference with multiway clustering. *J. Business & Economic Statistics*, 29(2), 238-49.

### Online Appendix VIII Robustness Check with Alternative Model Specification

We estimate an alternative model (Equation A8.1 below) following Israeli (2018, p.725) to ensure the robustness of the results:

$$Y_{ijk} = \alpha + \beta \times Treat_k + \sum_w \gamma_w \times Week_j^w + \delta \times Treat_k \times Post_{j|k} + \varphi X_k + f_i + \varepsilon_{ijk} \quad (A8.1)$$

The main difference between Equation (A8.1) and Equation (1) is that, instead of including a separate dummy indicator for each state as in Equation (1), Equation (A8.1) uses one single indicator  $Treat_k$  to differentiate the group of treated states versus the group of control states (1 if RCL ever took effect in state  $k$  during the observational period, and 0 otherwise). The interaction term  $Treat_k \times Post_{j|k}$  then indicates whether week  $j$  occurred after RCL took effect in state  $k$ ; and its coefficient captures the treatment effect of RCL.  $X_k$  represents a vector of state-level control variables, namely, political orientation (percentage of votes for the democrat candidate in the nearest presidential election; using percentage of votes in house election yields similar results) and demographics including income (median household income), education (the percentage of population with bachelor's degree or higher) and race (the percentage of non-Hispanic white). In addition, we include  $f_i$  to account for the fixed effect specific to each population group  $i$  (a unique combination of age group, gender and device as defined in section 2.3). Note that, because we control for the fixed effect of each unique population group, we have to omit the *Youth*, *Gender* and *Device* indicators in the model to avoid collinearity.

To examine the moderating effect of *Youth*, we modify Equation (A8.1) into:

$$Y_{ijk} = \alpha + \beta_1 Treat_k + \beta_2 Treat_k \times Youth_i + \sum_w \gamma_{1w} \times Week_j^w + \sum_w \gamma_{2w} \times Week_j^w \times Youth_i + \delta_1 Treat_k \times Post_{j|k} + \delta_2 Treat_k \times Post_{j|k} \times Youth_i + \varphi X_k + f_i + \varepsilon_{ijk} \quad (A8.2)$$

As shown in Tables A8 below, the treatment effects estimated from the alternative model are largely consistent with those from the main model specified in section 2.3.

**Table A8. Estimation results of Equations A8.1 and A8.2**

| DV                                     | IDV              | Coefficient                  |                              |
|----------------------------------------|------------------|------------------------------|------------------------------|
|                                        |                  | Estimated from Equation A8.1 | Estimated from Equation A8.2 |
| Cannabis search                        | Treat×Post       | .0682***<br>(.0096)          | .0774***<br>(.0137)          |
|                                        | Treat×Post×Youth |                              | -.1266***<br>(.0246)         |
| Alcohol search                         | Treat×Post       | -.1211***<br>(.0110)         | -.1321***<br>(.0177)         |
|                                        | Treat×Post×Youth |                              | .1958***<br>(.0296)          |
| Alcohol ad<br>clickthrough             | Treat×Post       | -.0108***<br>(.0015)         | -.0132***<br>(.0025)         |
|                                        | Treat×Post×Youth |                              | .0177***<br>(.0040)          |
| Publisher's revenue<br>from alcohol ad | Treat×Post       | -.0051***<br>(.0013)         | -.0056***<br>(.0019)         |
|                                        | Treat×Post×Youth |                              | .0062**<br>(.0030)           |
| Tobacco search                         | Treat×Post       | .0183***<br>(.0064)          | .0267***<br>(.0089)          |
|                                        | Treat×Post×Youth |                              | -.0617***<br>(.0212)         |
| Tobacco ad<br>clickthrough             | Treat×Post       | .0136***<br>(.0036)          | .0168***<br>(.0042)          |
|                                        | Treat×Post×Youth |                              | -.0345***<br>(.0095)         |
| Publisher's revenue<br>from tobacco ad | Treat×Post       | .0026**<br>(.0012)           | .0032***<br>(.0012)          |
|                                        | Treat×Post×Youth |                              | -.0042<br>(.0034)            |

Note: Other variables specified in Equations A8.1 and A8.2 are also included. Three, two, and one asterisks indicate 1%, 5%, and 10% statistical significance (two-tailed), respectively. We analyze aggregated data on population group level over time and the number of observations is 35,496.

## Online Appendix IX

### Estimating Treatment Effects for Adult Sub-dataset and Youth Sub-dataset Separately

To further understand the differential treatment effects of RCL on adults versus the youth, we estimate the following model for the adult sub-sample and the youth sub-sample separately:

$$Y_{ijk} = \beta_0 + \beta_1 \mathbf{Treat}_k \cdot \mathbf{Post}_{j|k} + \beta_2 \mathbf{Gender}_i + \beta_3 \mathbf{Device}_{1i} + \beta_4 \mathbf{Device}_{2i} + \sum_s \gamma_s \mathbf{State}_k^s + \sum_w \delta_w \mathbf{Week}_j^w + \varepsilon_{ijk} \quad (\text{A9.1})$$

where the variables share the same meanings as specified in Section 2.3 and  $\beta_1$  captures the treatment effect. The estimated results are in the table below.

Table A9.

| DV                      | Treatment effect         |                          |
|-------------------------|--------------------------|--------------------------|
|                         | Adult subsample estimate | Youth subsample estimate |
| Cannabis search         | .0848***<br>(.0086)      | -.0809**<br>(.0357)      |
| Alcohol search          | -.1379***<br>(.0149)     | .0184<br>(.0358)         |
| Alcohol ad clickthrough | -.0110***<br>(.0025)     | .0056<br>(.0049)         |
| Alcohol ad revenue      | -.0054***<br>(.0016)     | .0007<br>(.0038)         |
| Tobacco search          | .0313***<br>(.0095)      | -.0397*<br>(.0240)       |
| Tobacco ad clickthrough | .0157***<br>(.0046)      | -.0184*<br>(.0107)       |
| Tobacco ad revenue      | .0031*<br>(.0016)        | -.0007<br>(.0039)        |

Note: Coefficients are estimated for each subsample (adult vs youth) separately. All other variables specified in Equation (A9.1) are included. Three, two, and one asterisks indicate 1%, 5%, and 10% statistical significance (two-tailed), respectively. We analyze aggregated data on population group level over time and the number of observations is 17,748.

**Online Appendix X:  
Robustness check based on seed-list (without keyword expansion)**

**Table A10.1: Effects on cannabis search**

|                  | Equation 1           | Equation 2           |
|------------------|----------------------|----------------------|
| Treat×Post       | .0705***<br>(.0083)  | .0819***<br>(.0158)  |
| Treat×Post×Youth |                      | -.1609***<br>(.0281) |
| Youth            | .1396***<br>(.0069)  | .2018**<br>(.0832)   |
| Gender           | -.0320***<br>(.0041) | -.0377***<br>(.0060) |
| Device1          | .0077<br>(.0055)     | .0130<br>(.0076)     |
| Device2          | .0101<br>(.0067)     | .0120<br>(.0095)     |

**Table A10.2: Effects on alcohol search**

|                  | Equation 1           | Equation 2           |
|------------------|----------------------|----------------------|
| Treat×Post       | -.1166***<br>(.0126) | -.1359***<br>(.0208) |
| Treat×Post×Youth |                      | .1582***<br>(.0344)  |
| Youth            | .0914***<br>(.0098)  | .2063**<br>(.0951)   |
| Gender           | .0014<br>(.0061)     | -.0036<br>(.0074)    |
| Device1          | .0112<br>(.0073)     | .0121<br>(.0102)     |
| Device2          | .0160*<br>(.0093)    | .0191<br>(.0129)     |

**Table A10.3: Effects on tobacco search**

|                  | Equation 1          | Equation 2           |
|------------------|---------------------|----------------------|
| Treat×Post       | .0279***<br>(.0068) | .0297***<br>(.0103)  |
| Treat×Post×Youth |                     | -.0675***<br>(.0236) |
| Youth            | .0661***<br>(.0043) | .2656***<br>(.0558)  |
| Gender           | -.0024<br>(.0032)   | -.0059<br>(.0044)    |
| Device1          | .0078*<br>(.0044)   | .0091*<br>(.0056)    |
| Device2          | .0089*<br>(.0051)   | .0095<br>(.0070)     |
